# Supplementary material for: Heterogeneity and Clonal Evolution of Acquired PARP Inhibitor Resistance in TP53- and BRCA1 -Deficient Cells
Source: Oxford University Press journal article supplement (doi:10.1158/0008-5472.can-20-2912), 2021-01-29
Supplement: 00085472can202912-sup-250094_2_supp_6855962_qn6f9k.xlsx [file 00085472can202912-sup-250094_2_supp_6855962_qn6f9k.xlsx]

## Sheet: Antibodies
Antigen	Company	Cat#
pChk1 (Ser345)	Cell Signaling Technologies	2348S
Phospho-RPA32/RPA2 (Ser8)	Cell Signaling Technologies	83745
RAD51	Cell Signaling Technologies	8875S
CyclinA	Santa Cruz	SC271682
BRCA1	EMD Millipore	04-434
BRCA1	EMD Millipore	OP-92
Chk1	Santa Cruz	SC-8404
REV7	Abcam	ab180579
53BP1	EMD Millipore	MAB3802
PARP1	Santa Cruz	SC-2007
Vinculin	Santa Cruz	SC-25336
Poly(ADP-ribose)	Enzo Life Sciences	ALX-210-890-R100
pH3 (Ser10)	Cell Signaling Technologies	3465S
Zeb1	Santa Cruz	SC-515797
yH2AX	BioLegend	613407
TRIP13	Abcam	ab128171
Vimentin	Cell Signaling Technologies	9855S
Alexa Fluor Anti-Rabbit 488	Thermo Fisher	A11034
Alexa Fluor Anti-Mouse 647	Thermo Fisher	A32728
IRDye 680RD Anti-Mouse IgG	LICOR	926-68070
IRDye 800CW Anti-Rabbit IgG	LICOR	926-32211

## Sheet: Drugs
Agent	Company	Cat #
Belinostat	Selleck	S1085
Olaparib	Selleck	S1060
Niraparib	Selleck	S7625
cis-Diammineplatinum(II) dichloride crystalline	Sigma Aldrich	P4394
Abemaciclib	Selleck	S5716
Prexacertib	Selleck	S7178
Berzocertib	Selleck	S7102
Adavosertib	Selleck	S1525
Talazoparib	Selleck	S7048
